# Supplementary material
Source: PubMed Central journal article supplement (PMC2915881)
Supplement: supp_123_16_2792__1.pdf [file supp_123_16_2792__1.pdf]

**Table S1. Rat primers used for (semi-)quantitative RT-PCR**

| <b>Gene</b>       | <b>Forward primer</b>    | <b>Reverse primer</b> | <b>Access number</b> |
|-------------------|--------------------------|-----------------------|----------------------|
| Hnf6              | GAAAATAAGCGTCCGTCCAA     | ACTCCTCCTTCTCGCATTCA  | NM_022671            |
| Tcf1              | ATGAGCCGTCGTCTCCAG       | GTTGGATGGCAGCAGGTG    | X53297               |
| Tcf2              | TGCGGTGACTCAGCTACAGA     | ATCTGTGACCACCATTGCAG  | NM_013103            |
| Pdx1              | CGGACATCTCCCCATACG       | AAAGGGAGATGAACGCGG    | NM_022852            |
| Sox9              | TTCATGAAGATGACCGACGA     | GTCCAGTCGTAGCCCTTCAG  | XM_001081628         |
| Pcna              | TCACAAAAGCCACTCCACTG     | CGATCTTGGGAGCCAAATAA  | NM_022381            |
| Glut-2            | TGGGTTCCCTCCAGTTTCG      | AGGCGTCTGGTGTTCGTATG  | NM_012879            |
| Nestin            | CAGGAGGTGGGTGCTCTAAA     | ACCAGGAATCCCCATCTACC  | NM_012987            |
| Nkx2.2            | ATCTGGTTCCAAAACCATCG     | TGTAAGGGCGTTGTATTGC   | XM_345446            |
| Nkx6.1            | ACTTGGCAGGACCAGAGAGA     | GGGCTTGTTGTAATCGTCGT  | NM_031737            |
| Ptf1a-p48         | GGACTACGGTCTCCCTCCTC     | CCTCTGGGGTCCCACTTTA   | NM_053964            |
| Uchl1 (Pgp9.5)    | GAGAAGAACGAGGCCATTCA     | ATCCTGCAGCAGAGAGTCCT  | NM_017237            |
| Cytokeratin 20    | TACGAAACCAATGCACCG       | GGAGATCGGCTTCCACAG    | NM_173128            |
| Vimentin          | ACATCCACCCGCACCTAC       | CAACTCCCTCATCTCCTCCTC | NM_031140            |
| E-cadherin        | ATCTCCCTGGAAGCAGGATT     | GCTCTTTGACCACCGTTCTC  | NM_031334            |
| Cftr              | TAAGCCATGGTCACAAGCAG     | ACCAGCGAAGGCTTGTCTTA  | NM_031506            |
| Rpl32             | CAATGTGTCCTCTAAGAACCGAAA | CCTGGCGTTGGGATTGG     | NM_013226            |
| 18S ribosomal RNA | GCAATTATTCCTCATGAACG     | GGCCTCACTAAACCATCC    | M11188               |
