# Supplementary material
Source: PubMed Central journal article supplement (PMC2915881)
Supplement: supp_123_16_2792__2.pdf [file supp_123_16_2792__2.pdf]

**Table S2. Primary antibodies used for immunostaining**

| Name             | Derived species | Vendor                                                             | Dilution (Method)                                       |
|------------------|-----------------|--------------------------------------------------------------------|---------------------------------------------------------|
| Pdx-1            | Rabbit          | Gift from Jonathan Slack, University of Minnesota, Minneapolis, MA | 1:6000 (Pa, TSA)                                        |
| Idx-1            | Rabbit          | Our own                                                            | 1:1000 (Pa, Bio-SA)                                     |
| Hnf6             | Rabbit          | Santa Cruz Biotechnology                                           | 1:100 (Pa, ABC)<br>1:3000 (C, ABC)<br>1:150 (C, Bio-SA) |
| Sox9             | Rabbit          | Chemicon International                                             | 1:500 (Pa, ABC)<br>1:3000 (Pa, TSA)                     |
| FoxA2            | Goat            | Santa Cruz Biotechnology                                           | 1:100 (C, Bio-SA)                                       |
| Glut2            | Rabbit          | Chemicon International                                             | 1:400 (C, Bio-SA)                                       |
| MafA             | Rabbit          | Our own                                                            | 1:400 (Pa, Bio-SA)                                      |
| Nkx2.2           | Mouse           | Developmental Studies Hybridoma Bank                               | 1:75 (C, Bio-SA)                                        |
| Nkx6.1           | Mouse           | Developmental Studies Hybridoma Bank                               | 1:500 (C, Bio-SA)                                       |
| Ngn3             | Mouse           | Developmental Studies Hybridoma Bank                               | 1:100 (C, Bio-SA)                                       |
| Synaptophysin    | Rabbit          | DAKO                                                               | 1:100 (Pa, Bio-SA)                                      |
| Tcf2             | Goat            | Santa Cruz Biotechnology                                           | 1:100 <sup>a</sup> (Pa)                                 |
| Insulin          | Guinea pig      | LINCO Research                                                     | 1:300 <sup>a</sup> (Pa)                                 |
| Amylase          | Goat            | Santa Cruz Biotechnology                                           | 1:100 <sup>a</sup> (Pa)                                 |
| E-cadherin       | Mouse           | BD Transduction Labs                                               | 1:100 <sup>a</sup> (Pa)                                 |
| Cytokeratin 20   | Mouse           | DAKO                                                               | 1:400 <sup>a</sup> (Pa)                                 |
| $\beta$ -catenin | Rabbit          | Cell Signaling Technology                                          | 1:200 <sup>a</sup> (Pa)                                 |
| Pan-Cytokeratin  | Rabbit          | DAKO                                                               | 1:100 <sup>a</sup> (Pa)                                 |

<sup>a</sup> The direct fluorescein-conjugated secondary antibody was applied for these primary antibodies

Abbreviations: Pa, paraffin-embedded section; C, cryosection; ABC, peroxidase-based immunohistochemistry (Elite ABC kit, Vector Labs); Bio-SA, biotin-streptavidin-conjugated fluorescein amplification; TSA, tyramide signal amplification (Perkin Elmer)
